# Supplementary material for: Citrus limonoids induce apoptosis and inhibit the proliferation of pancreatic cancer cells
Source: Royal Society of Chemistry journal article supplement (doi:10.1039/d0fo02740e), 2020-12-17
Supplement: d0fo02740e1.pdf [file d0fo02740e1.pdf]

### Supplementary data

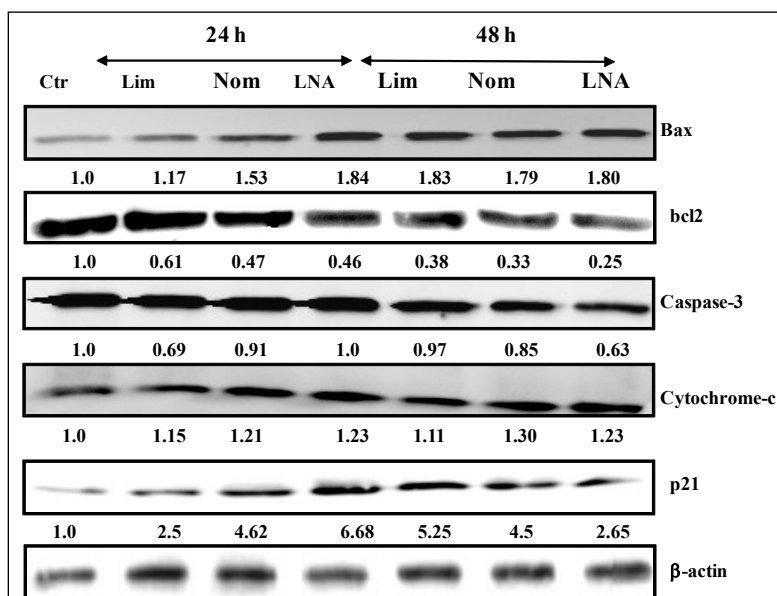

Figure S1. A. Expression of apoptosis related proteins by treatment of limonin, nomilin and LNA (60  $\mu$ M) for 24 h and 48 h. Proteins from treated cells were separated on 12% SDS-PAGE and transferred in to nitrocellulose membrane. Immunoblotting using  $\beta$ - actin, Bax, bcl<sub>2</sub>, cytochrome-c, aspase-3, p21 and caspase-8 antibodies were performed as described in methods.
